# Supplementary material for: Neuromedin U and neurotensin may promote the development of the tumour microenvironment in neuroblastoma
Source: PeerJ. 2021 Jun 1;9:e11512. doi: 10.7717/peerj.11512 (PMC8176915; doi:10.7717/peerj.11512)
Supplement: Supplemental Information 8 — The relative interval width changes between initial width(0h) and residual(48h). [file peerj-09-11512-s008.xlsx]

## Sheet: Sheet1
si-NMU	si-NC	si-NTS	si-NC
281	360	251	311
259	367	262	321
267	352	251	315
